# Supplementary material
Source: PubMed Central journal article supplement (PMC555486)

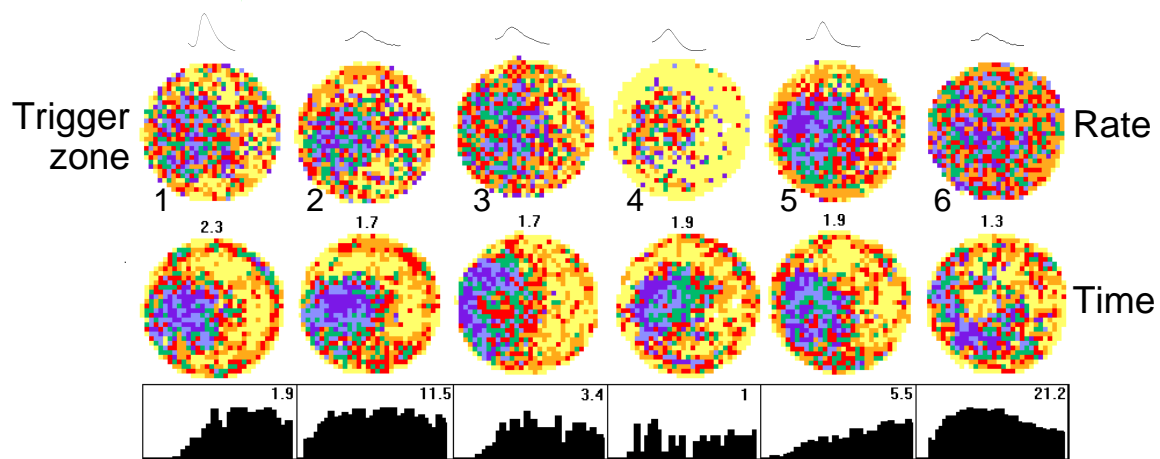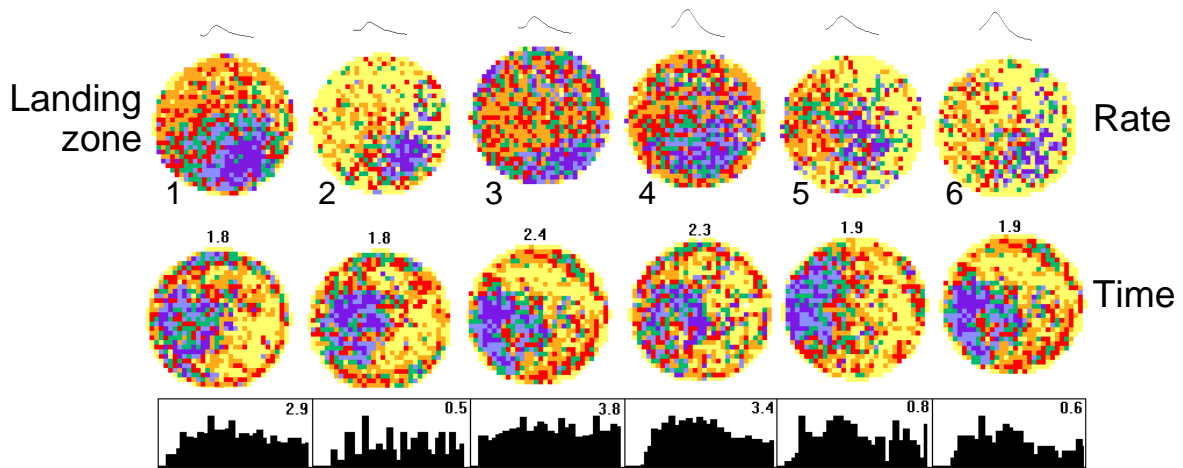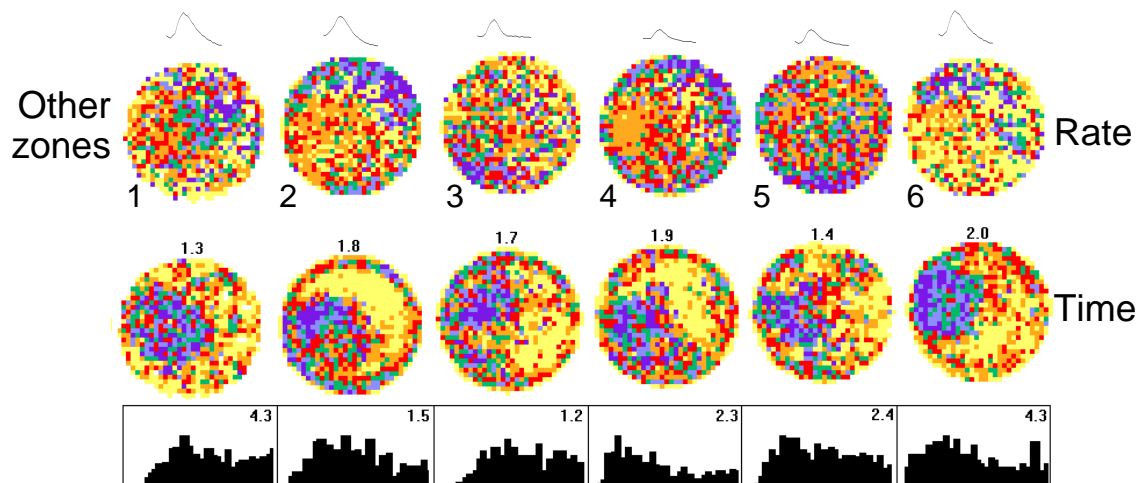

Supplement: pnas_102_12_4602__1.pdf [file pnas_102_12_4602__1.pdf]

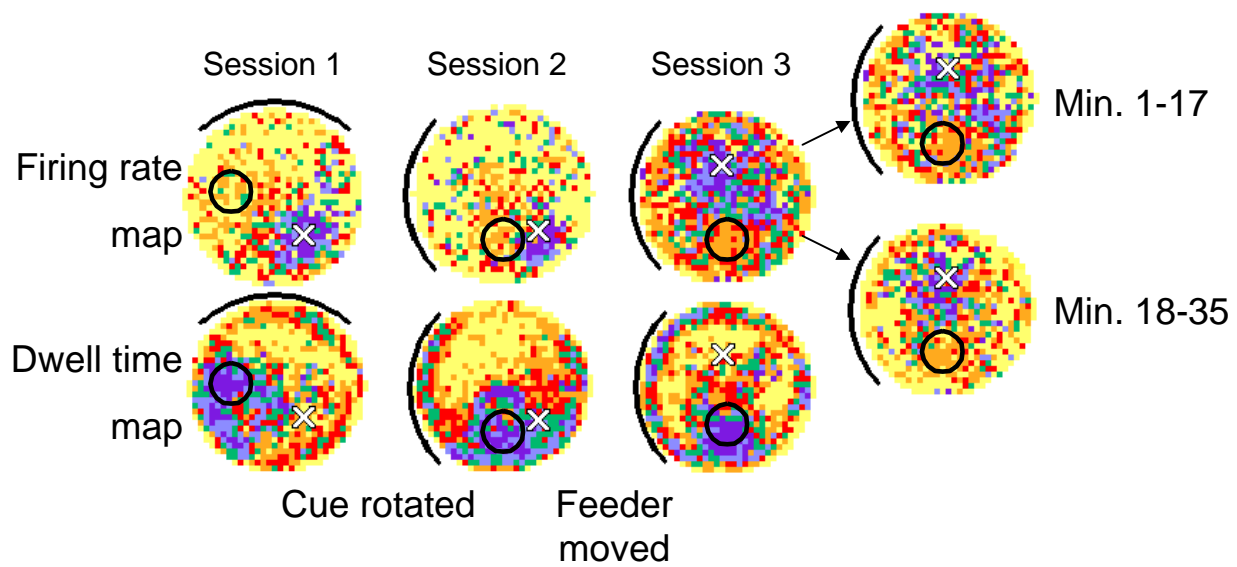

Supplement: pnas_102_12_4602__2.pdf [file pnas_102_12_4602__2.pdf]
